# Supplementary material for: Transcriptome Analysis of Cyanide-Treated Rice Seedlings: Insights into Gene Functional Classifications
Source: MDPI journal article supplement (doi:10.3390/life12111701), 2022-10-26
Supplement: s1 [file s1]

Supporting information for

# Transcriptome Analysis of Cyanide-Treated Rice Seedlings: Insights into Gene Functional Classifications

Cheng-Zhi Li, Yu-Juan Lin and Xiao-Zhang Yu \*

College of Environmental Science & Engineering, Guilin University of Technology, Guilin 541004, China

\* Correspondence: xzyu@glut.edu.cn; Tel.: +86-7735897016

## Supporting Information M1

### 1.1. RNA Extraction

Real-time quantitative PCR (RT-qPCR) was used to quantify expression levels of 25 DEGs identified in CN-treated rice seedlings. Total RNA was extracted from both root and shoot of all rice samples by using an Ultrapure RNA Kit (CWBio, Taizhou, China). DNase I (CWBio, Taizhou, China) was used to remove genomic DNA contamination if any from RNA extract. Then, the total RNA was purified with an RNeasy MinElute Cleanup Kit (Qiagen, Hilden, Germany). Each sample was prepared in four independent biological replicates.

### 1.2. PCR Analysis

All gene primer sequences are listed in Table S1. RT-qPCR cycling conditions were as follows: (1) denaturation at 95 °C for 10 s, (2) annealing at 58 °C for 30 s, and (3) extension at 72 °C for 32 s. This cycle was imitated 40 times. The RT-qPCR analysis was executed using the 7500 Fast Real-Time PCR system (Applied Biosystems) and SYBR green chemistry. Rice glyceraldehyde-3-phosphate dehydrogenase (LOC\_Os08g03290.1) was selected as the house-keeping gene. The standard  $2^{-\Delta\Delta CT}$  method was used to calculate the relative expression of each of the targeted genes.

**Table S1.** Sequence of forward and reverse primers used in gene expression analysis.

| MSU ID           | Primer Sequences(5'-3')                             | Amplicon Size (bp) | Accession NO.  |
|------------------|-----------------------------------------------------|--------------------|----------------|
| LOC_Os09g32948.1 | F-CGGCCAAAGCATGACCAGA<br>R-ACCCGTGCCTTCAGTTTGAG     | 135                | XM_015755338.1 |
| LOC_Os04g08034.2 | F-TGCAGTGAATACCGGATGTG<br>R-TGGCTCGGTGTCTGAATAAAG   | 167                | XM_026024798.1 |
| LOC_Os02g36030.1 | F-CTGTCATCGTCAACTAGTCACA<br>TTTCTCCTAAAGCACTCTCTCG  | 89                 | XM_015768639.2 |
| LOC_Os03g51690.2 | F-TCGCAATATCCTTTCTCCG<br>R-CAGGTAGCTCTGTCTCTCT      | 71                 | NM_001402246.1 |
| LOC_Os06g22980.1 | F-CGGGTACGACCACAACAAGA<br>R-GGCCTGGCAGTTGTAGATGT    | 124                | XM_015787107.2 |
| LOC_Os10g38740.1 | F-CAAAGTGAGATGACATGACACG<br>R-CGATCAAGGAACTCAATCGTG | 121                | NM_001404053.1 |
| LOC_Os01g53240.1 | F-TTCATCTACAACCTACGCCGC<br>R-AATGTACGGCCATCGTCTTC   | 109                | NM_001406101.1 |
| LOC_Os01g09010.1 | F-GTTCTTCCAGTTCGCCAAGG<br>R-GGAGACGTAGATGGACTCGTA   | 79                 | NM_001401471.1 |
| LOC_Os07g44690.1 | F-TGGTGGTGTCTGATGGAGATG<br>R-CCTGACGAAGCTGGAGAAGT   | 233                | NM_001403228.1 |
| LOC_Os03g33012.1 | F-TATGAAGGCAAGCACAGCCA<br>R-ACGTTGGCATTAGCGGAAGA    | 71                 | XM_026024276.1 |
| LOC_Os01g50400.1 | F-TCCAAGTGCTCAACGAGTCC<br>R-TCGGGATCAACACACTCTGC    | 142                | XM_015783515.2 |
| LOC_Os03g59740.1 | F-CTGTGCTGCTTGTCTTTGCT<br>R-CCTCGTACAATCCCTCACCT    | 150                | XM_026024224.1 |
| LOC_Os11g14380.1 | F-TCGAGTGGATGACACCGTTC<br>R-TAGTGACCGGACTTGCGATG    | 193                | XM_015760390.2 |
| LOC_Os12g18560.1 | F-ATGGTGCTCATCGTCCTCC<br>R-AGTAGGAGGTGGAGTTGCAG     | 199                | XM_015763615.2 |
| LOC_Os01g49920.1 | F-ACCATGAACCTGTCCGTGCA<br>R-GTTGCGGTGATGAGCCATTC    | 197                | XM_026026747.1 |
| LOC_Os01g11040.1 | F-ATCTGGTGCGAAGTCCACTG<br>R-GGATTGTGCGGAATGAAGGC    | 144                | NM_001404886.1 |
| LOC_Os01g27360.1 | F-CGCAAGTACAAGACGAGGGA<br>R-TGCACTCGTACACAATCGGT    | 133                | NM_001401479.1 |
| LOC_Os09g20220.1 | F-CTCCTGGACTTGTGGGTGAG<br>R-CCTTCTTCTTCTCCGGCTCC    | 241                | XM_015757106.2 |
| LOC_Os02g26810.1 | F-CTACCTCAACAAGTGCCGTG<br>R-TCCGCCTCAAGGATATGGTC    | 144                | XM_015771093.2 |
| LOC_Os04g12600.1 | F-CAGCCGACTCCTTACCACAG<br>R-ATCTGGGTCAAGCGTAGCAC    | 283                | XM_015779053.2 |
| LOC_Os03g19420.1 | F-GCGCTCTTCACCGACCTC<br>R-CTCCAGCTTGCTCAGGTTGA      | 231                | XM_015775142.2 |
| LOC_Os09g38790.1 | F-CAGACTTCGTTCCCTATGGC<br>R-ATTAGAAGCGGGTGGAGGTA    | 243                | XM_015756342.2 |
| LOC_Os08g10320.1 | F-AGCAACCACCAAGAACCGAT<br>R-GCCGTTGATGTAGGAGCAGT    | 197                | XM_015794478.1 |
| LOC_Os07g01820.5 | F-ACTGGTGGAGAGGCAGAAGA                              | 156                | NM_001402986.1 |

|                  |                                                    |     |                |
|------------------|----------------------------------------------------|-----|----------------|
|                  | R-TGTGGTGGGAAGAAGTGCCTG                            |     |                |
| LOC_Os02g12380.1 | F-TGATCCAGATGAAAGGCACG<br>R-AACCAAGATCGTCTGCCATC   | 194 | XM_015772257.2 |
| LOC_Os08g03290.1 | F-GACAGCAGGTCGAGCATCTTC<br>R-CAGGCGACAAGCTTGACAAAG | 74  | NM_001403382.1 |

**Table S2.** DEGs in roots of CN<sup>-</sup>-treated rice seedlings assigned to the top 3 modules.

|                                                                       | Number of DEGs in Roots |           |           |                |            |           |
|-----------------------------------------------------------------------|-------------------------|-----------|-----------|----------------|------------|-----------|
|                                                                       | Up-Regulated            |           |           | Down-Regulated |            |           |
|                                                                       | M 1                     | M 2       | M 3       | M 1            | M 2        | M 3       |
| [A] RNA processing and modification                                   | 3                       |           |           |                |            |           |
| [B] Chromatin structure and dynamics                                  |                         |           |           | 1              |            |           |
| [C] Energy production and conversion                                  | 3                       | 15        | 7         |                | 16         | 4         |
| [D] Cell cycle control, cell division, chromosome partitioning        | 3                       |           |           |                |            |           |
| [E] Amino acid transport and metabolism                               |                         | 5         | 4         | 1              |            | 4         |
| [F] Nucleotide transport and metabolism                               |                         |           |           |                |            |           |
| [G] Carbohydrate transport and metabolism                             | 1                       | 7         | 7         | 2              | 35         | 4         |
| [H] Coenzyme transport and metabolism                                 |                         |           | 3         |                | 3          |           |
| [I] Lipid transport and metabolism                                    | 1                       |           | 3         | 3              | 6          | 2         |
| [J] Translation, ribosomal structure, and biogenesis                  | 9                       | 1         | 2         |                |            |           |
| [K] Transcription                                                     | 8                       |           |           | 2              | 1          | 4         |
| [L] Replication, recombination, and repair                            |                         |           |           |                |            |           |
| [M] Cell wall/membrane/envelope biogenesis                            |                         |           | 1         |                | 3          | 1         |
| [O] Post-translational modification, protein turnover, and chaperones | 16                      | 1         | 6         | 6              | 8          | 3         |
| [P] Inorganic ion transport and metabolism                            | 1                       | 5         | 1         | 2              |            | 5         |
| [Q] Secondary metabolites biosynthesis, transport, and catabolism     |                         | 1         | 7         | 2              | 34         | 11        |
| [T] Signal transduction mechanisms                                    | 10                      |           |           | 63             | 1          | 6         |
| [U] Intracellular trafficking, secretion, and vesicular transport     | 1                       | 1         |           | 7              |            | 1         |
| [V] Defense mechanisms                                                |                         | 2         |           |                | 1          | 1         |
| [W] Extracellular structures                                          |                         |           |           |                |            |           |
| [Y] Nuclear structure                                                 |                         |           |           |                |            |           |
| [Z] Cytoskeleton                                                      | 1                       | 1         |           | 7              |            | 2         |
| <b>Total</b>                                                          | <b>57</b>               | <b>39</b> | <b>41</b> | <b>96</b>      | <b>108</b> | <b>48</b> |

**Table S3.** DEGs in shoots of CN<sup>-</sup>-treated rice seedlings assigned to the top 3 modules.

|                                                                       | Number of DEGs in Shoots |           |           |                |           |           |
|-----------------------------------------------------------------------|--------------------------|-----------|-----------|----------------|-----------|-----------|
|                                                                       | Up-Regulated             |           |           | Down-Regulated |           |           |
|                                                                       | M 1                      | M 2       | M 3       | M 1            | M 2       | M 3       |
| [A] RNA processing and modification                                   |                          |           |           |                |           | 3         |
| [B] Chromatin structure and dynamics                                  |                          |           |           |                |           | 2         |
| [C] Energy production and conversion                                  |                          |           | 2         | 11             |           |           |
| [D] Cell cycle control, cell division, chromosome partitioning        | 1                        |           |           | 1              |           | 5         |
| [E] Amino acid transport and metabolism                               |                          |           |           | 5              |           | 3         |
| [F] Nucleotide transport and metabolism                               |                          |           |           |                |           |           |
| [G] Carbohydrate transport and metabolism                             | 3                        | 1         | 2         | 15             | 2         | 1         |
| [H] Coenzyme transport and metabolism                                 |                          |           |           |                |           |           |
| [I] Lipid transport and metabolism                                    |                          |           |           | 11             | 1         |           |
| [J] Translation, ribosomal structure, and biogenesis                  |                          |           |           |                |           | 1         |
| [K] Transcription                                                     | 1                        |           |           |                | 6         | 5         |
| [L] Replication, recombination, and repair                            | 1                        |           |           |                | 1         | 7         |
| [M] Cell wall/membrane/envelope biogenesis                            |                          |           |           |                |           |           |
| [O] Post-translational modification, protein turnover, and chaperones |                          | 1         | 1         | 12             | 1         | 4         |
| [P] Inorganic ion transport and metabolism                            |                          |           |           |                |           | 2         |
| [Q] Secondary metabolites biosynthesis, transport, and catabolism     | 2                        |           | 10        | 18             |           | 3         |
| [T] Signal transduction mechanisms                                    | 6                        | 12        |           | 1              | 51        | 9         |
| [U] Intracellular trafficking, secretion, and vesicular transport     |                          |           |           |                | 3         | 1         |
| [V] Defense mechanisms                                                |                          |           |           | 4              |           |           |
| [W] Extracellular structures                                          |                          |           |           |                |           |           |
| [Y] Nuclear structure                                                 |                          |           |           |                |           | 1         |
| [Z] Cytoskeleton                                                      |                          |           |           |                |           | 3         |
| <b>Total</b>                                                          | <b>14</b>                | <b>14</b> | <b>15</b> | <b>78</b>      | <b>65</b> | <b>50</b> |

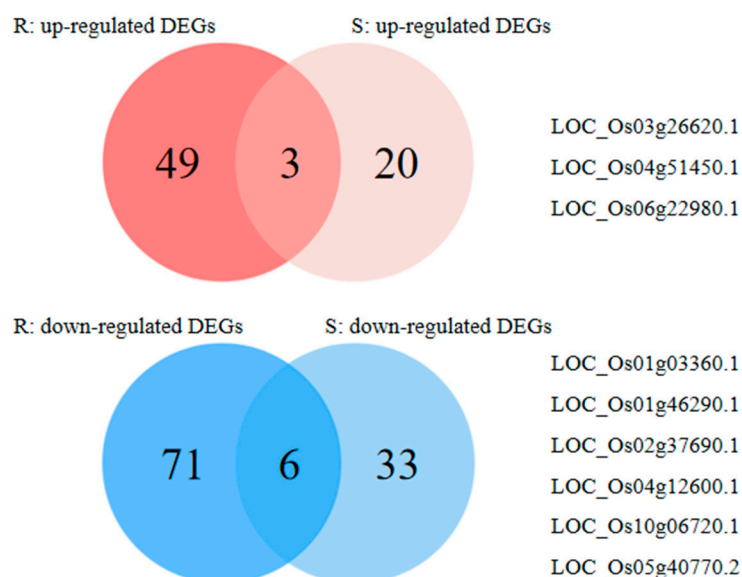**Figure S1.** DEGs aligned to carbohydrate transport and metabolism classifications.

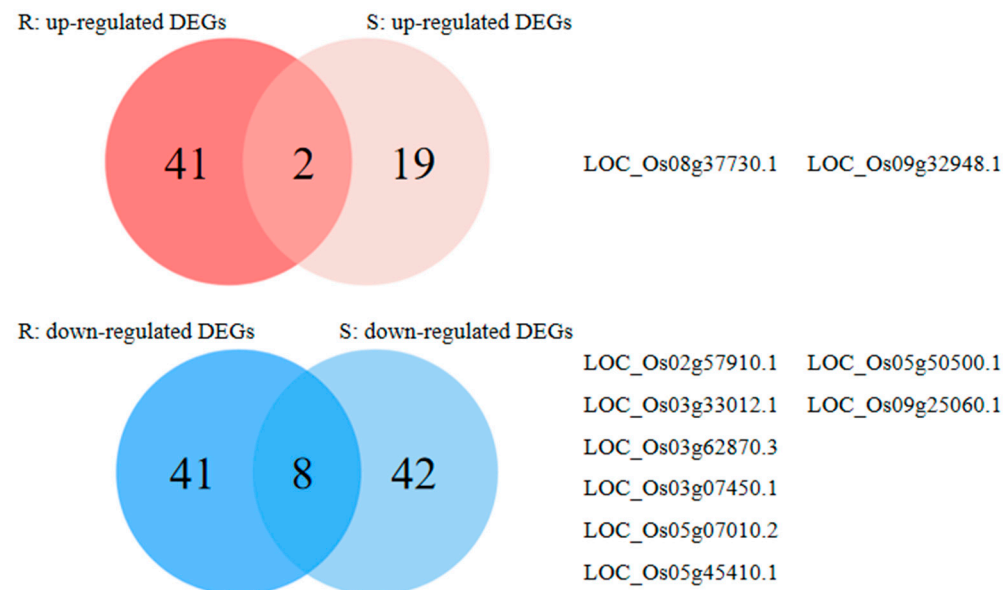

Figure S2. DEGs aligned to transcription classifications.

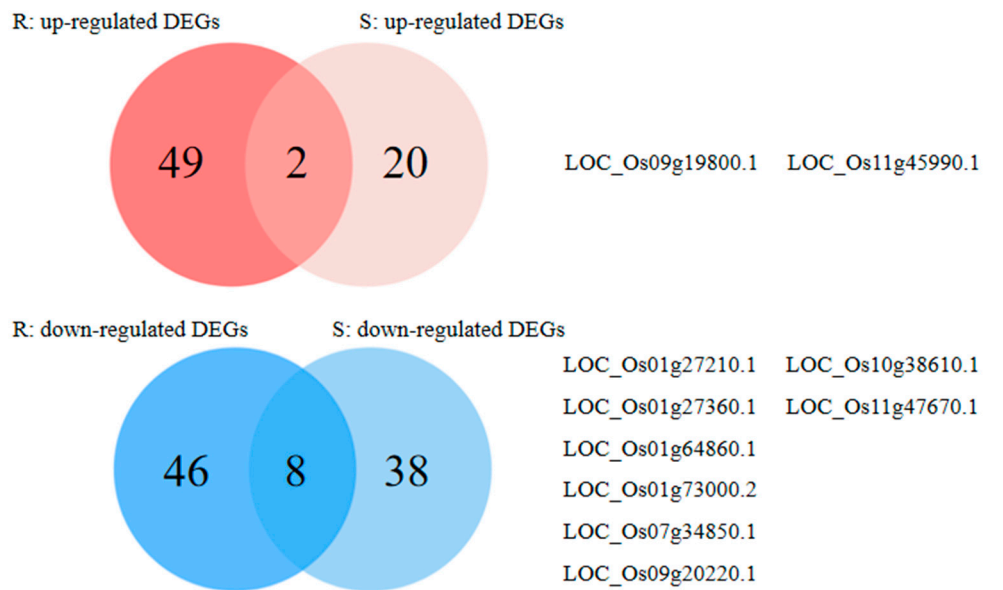

Figure S3. DEGs aligned to post-translational modification, protein turnover, and chaperones classifications.

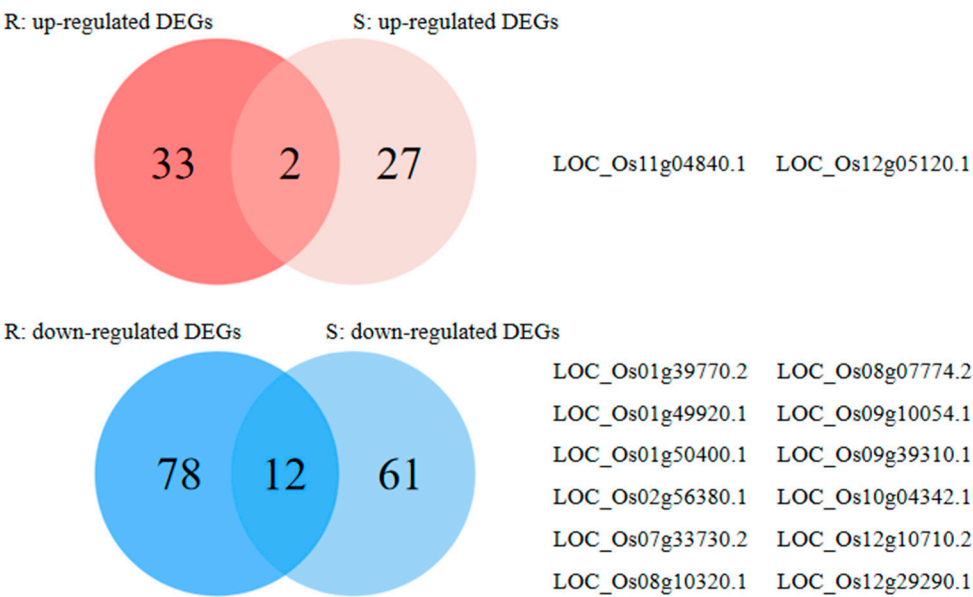

**Figure S4.** DEGs aligned to signal transduction mechanisms classifications.
